# Supplementary material for: Selective Structural Derivatization of Flavonoid Acetamides Significantly Impacts Their Bioavailability and Antioxidant Properties
Source: MDPI journal article supplement (doi:10.3390/molecules27238133), 2022-11-22
Supplement: s1 [file s1]

Article

# Selective Structural Derivatization of Flavonoid Acetamides Significantly Impacts their Bioavailability and Antioxidant Properties

Daniel Kasungi Isika <sup>1</sup>, Omowunmi A. Sadik <sup>1</sup>, \*

<sup>1</sup> Department of Chemistry and Environmental Science, BioSensor Materials for Advanced Research & Technology (BioSMART Center), New Jersey Institute of Technology, 161 Warren Street, University Heights, Newark, NJ, 07102, USA.

\* Correspondence: Omowunmi A. Sadik (sadik@njit.edu)

**Supporting Information- SI**

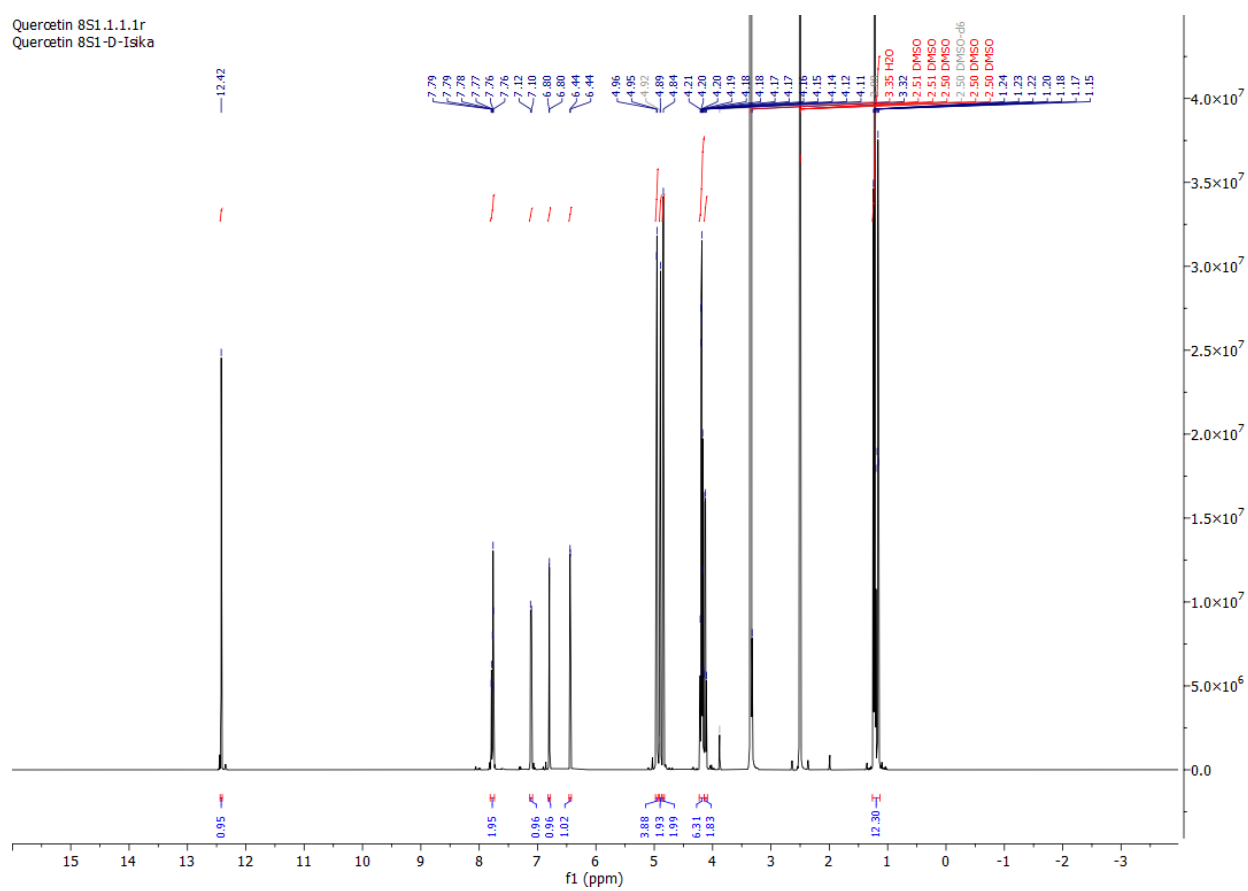Figure S1:  $^1\text{H}$  NMR spectrum (500 MHz,  $\text{DMSO-d}_6$ ): compound 2

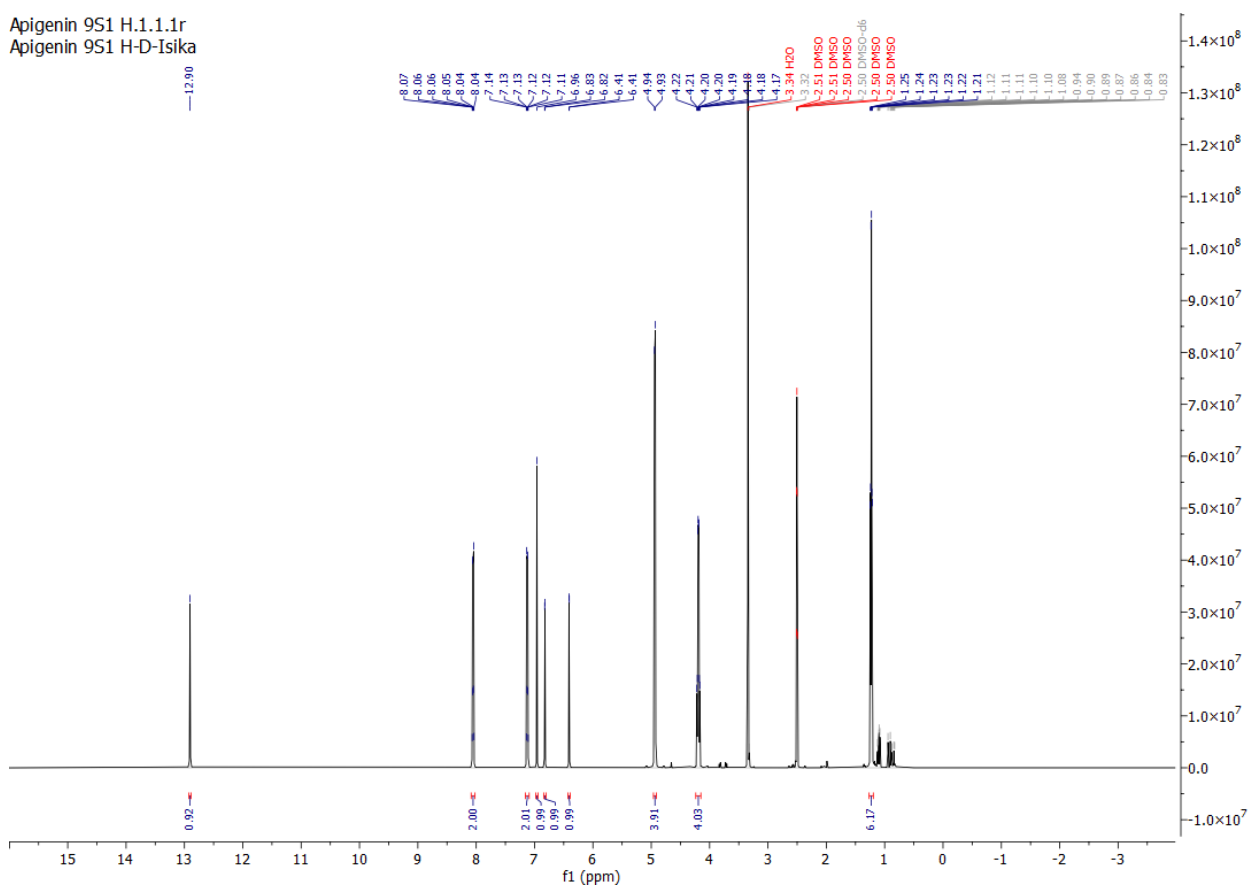Figure S2:  $^1\text{H}$  NMR spectrum (500 MHz,  $\text{DMSO-d}_6$ ): compound 9

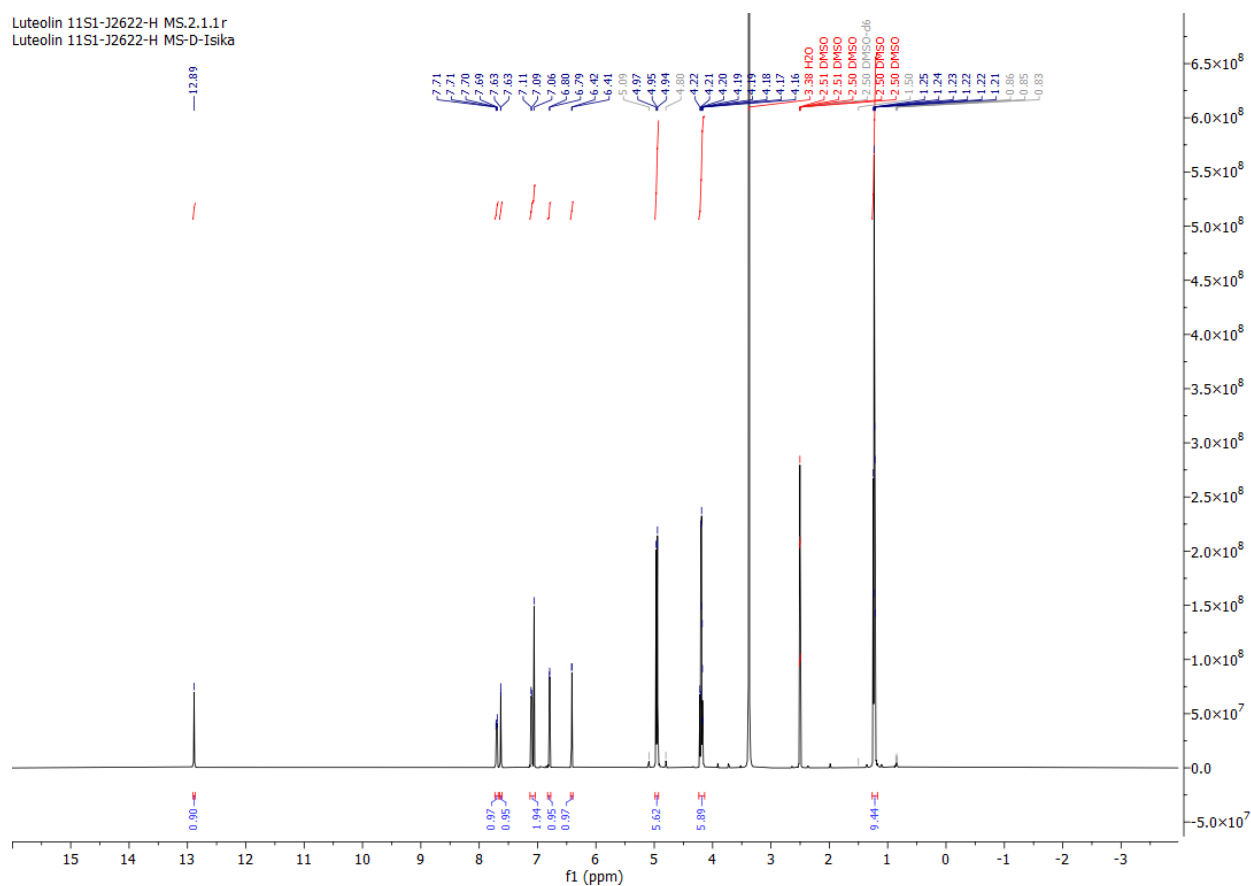Figure S3: <sup>1</sup>H NMR spectrum (500 MHz, DMSO-d<sub>6</sub>): compound 13

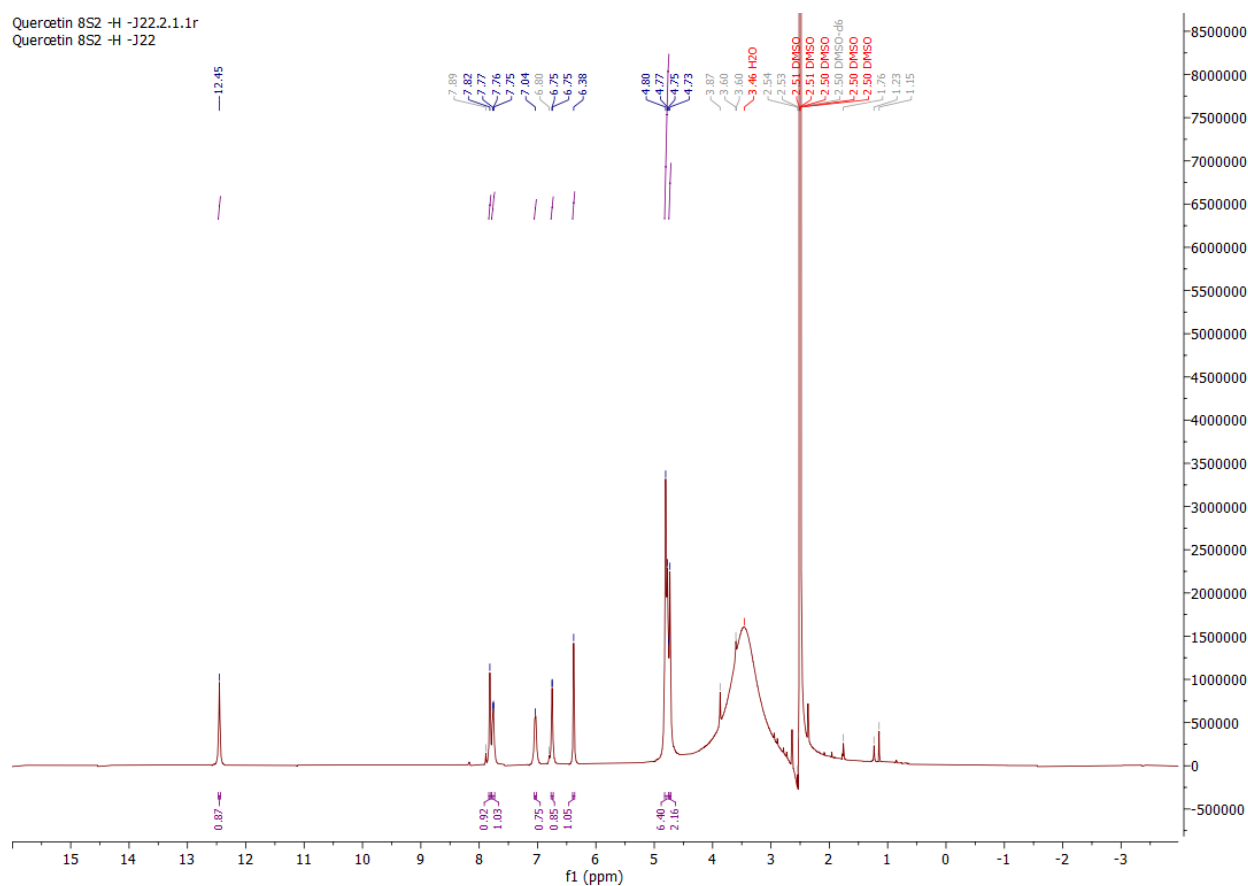Figure S4:  $^1\text{H}$  NMR spectrum (500 MHz, DMSO- $d_6$ ): compound 3

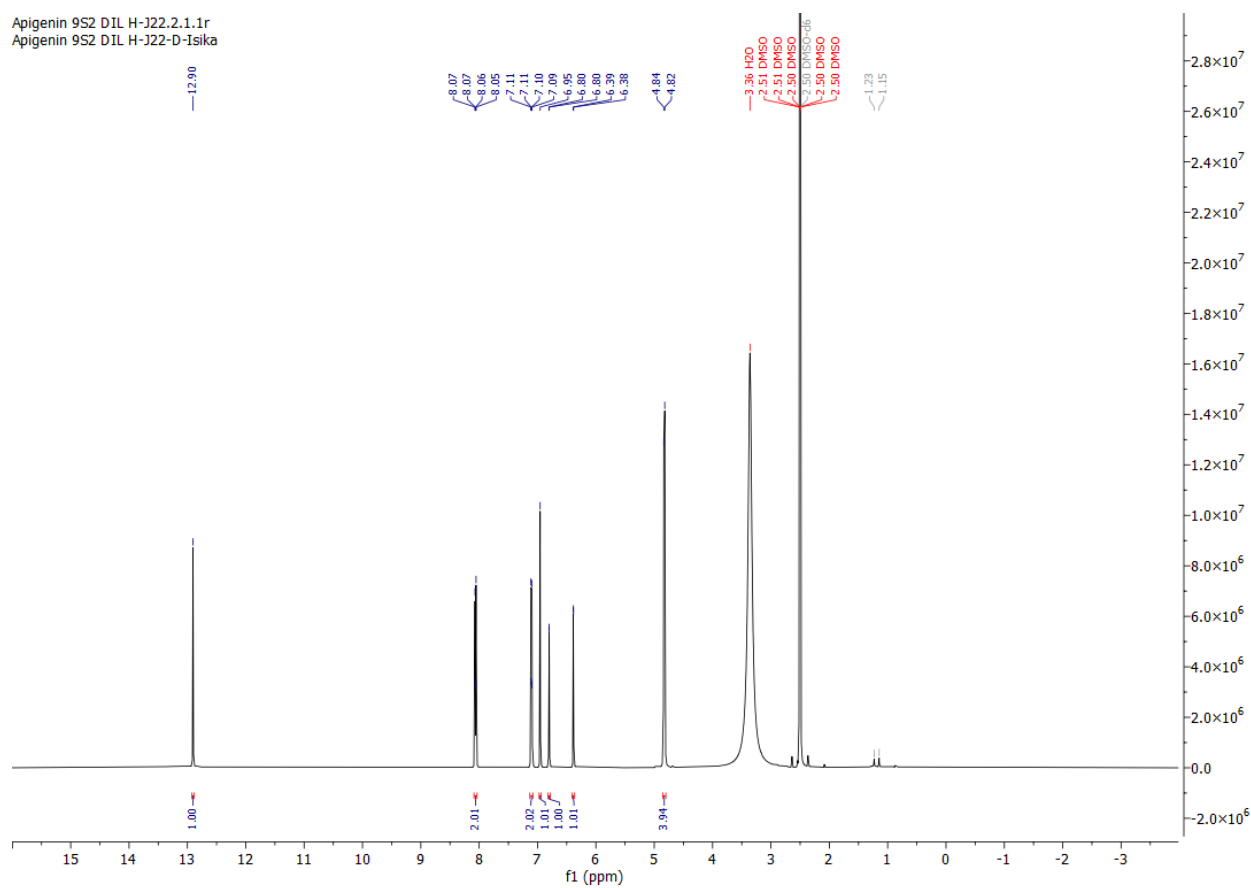Figure S5:  $^1\text{H}$  NMR spectrum (500 MHz,  $\text{DMSO-d}_6$ ): compound 10

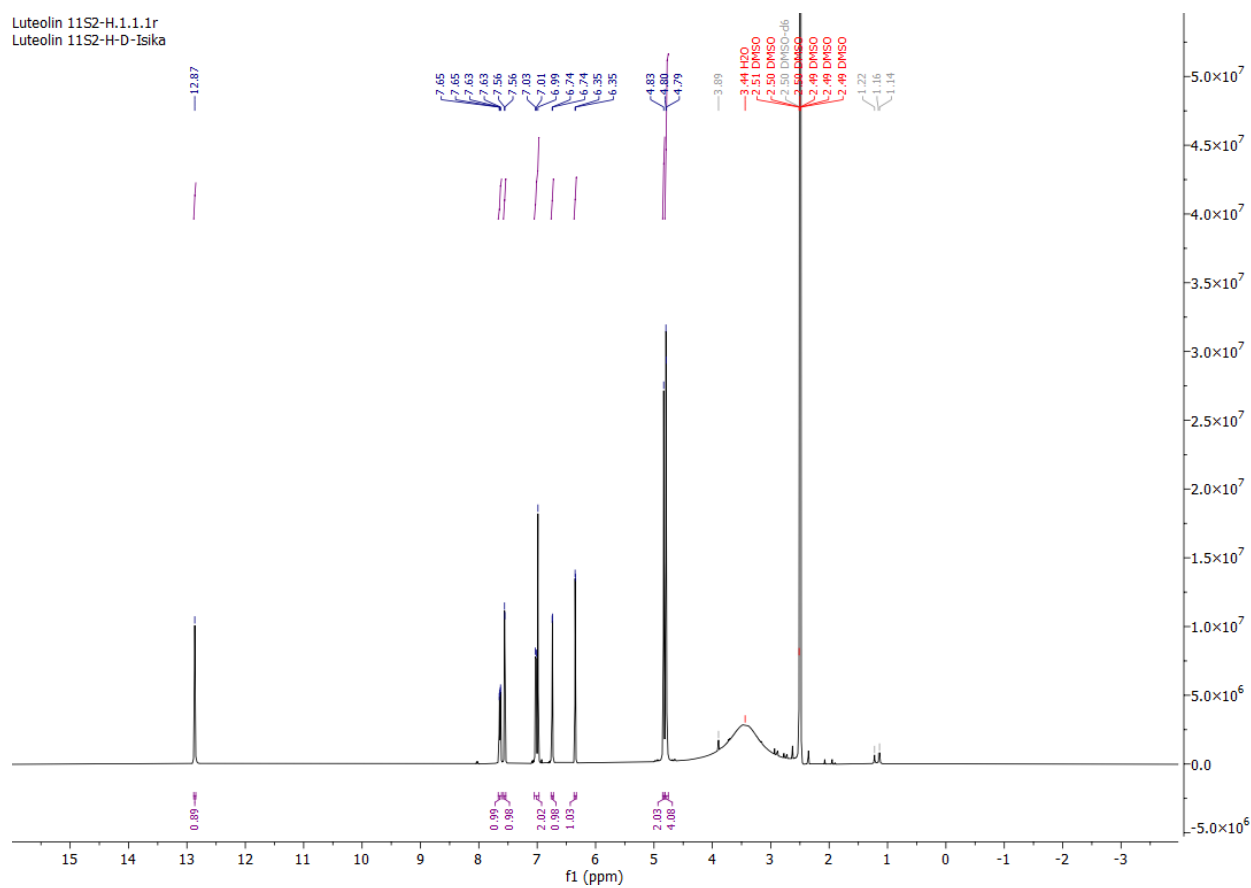Figure S6:  $^1\text{H}$  NMR spectrum (500 MHz,  $\text{DMSO-d}_6$ ): compound 14

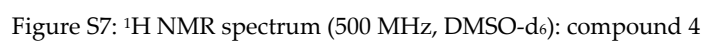

Figure S7:  $^1\text{H}$  NMR spectrum (500 MHz,  $\text{DMSO-d}_6$ ): compound 4



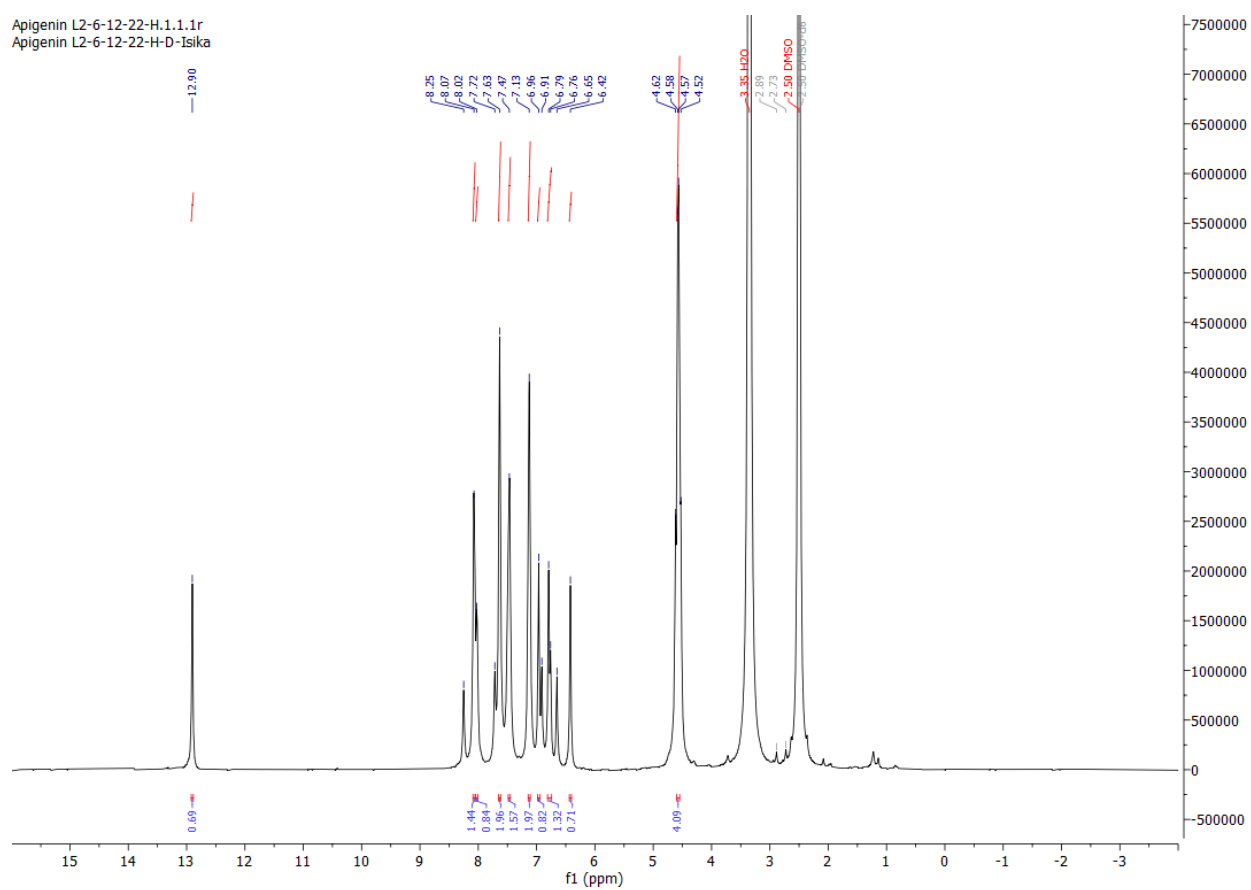Figure S8:  $^1\text{H}$  NMR spectrum (500 MHz,  $\text{DMSO-d}_6$ ): compound 11

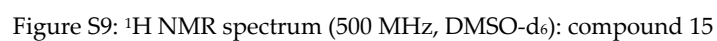

Figure S9:  $^1\text{H}$  NMR spectrum (500 MHz,  $\text{DMSO-d}_6$ ): compound 15

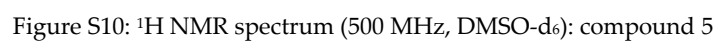

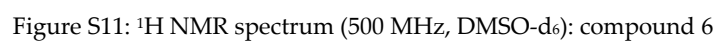

Figure S11:  $^1\text{H}$  NMR spectrum (500 MHz, DMSO- $d_6$ ): compound 6

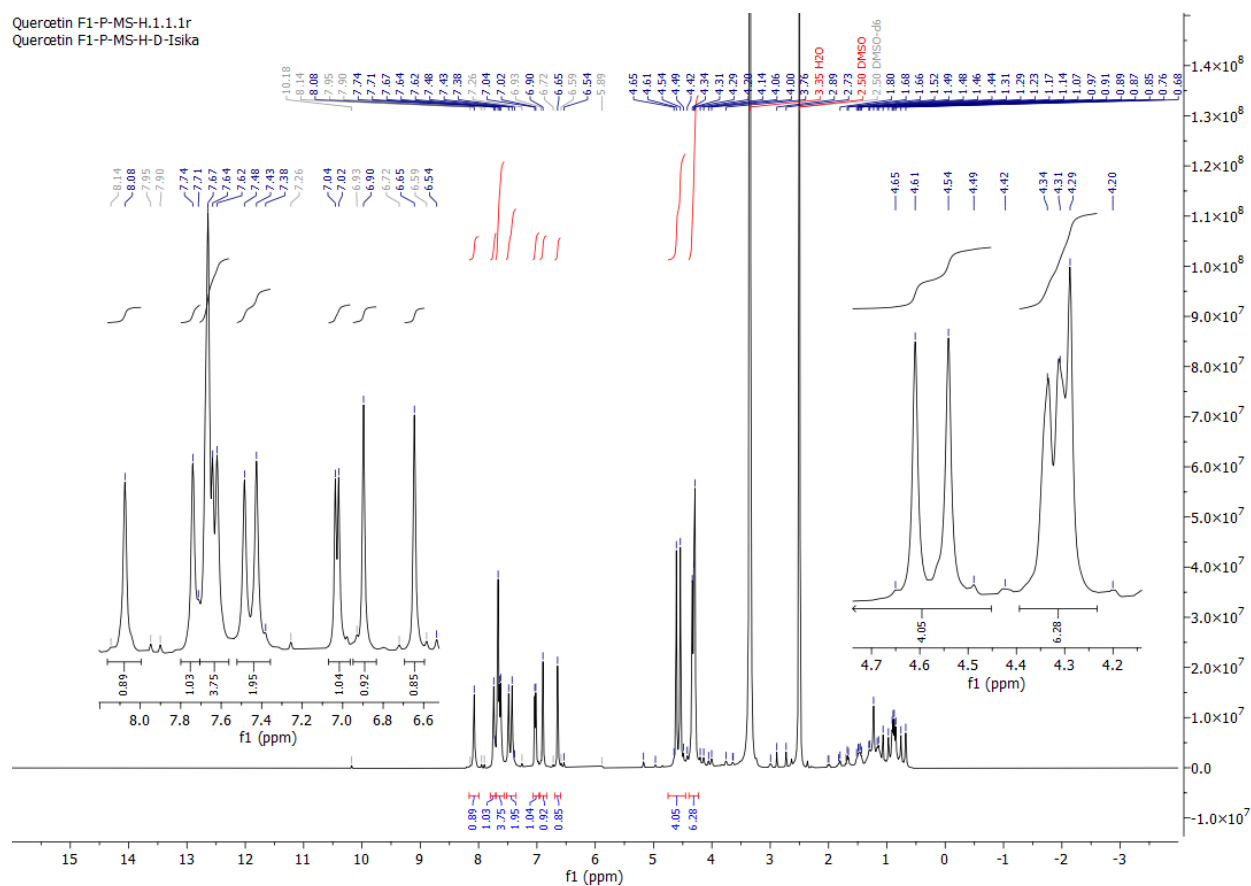Figure S12:  $^1\text{H}$  NMR spectrum (500 MHz,  $\text{DMSO-d}_6$ ): compound 7

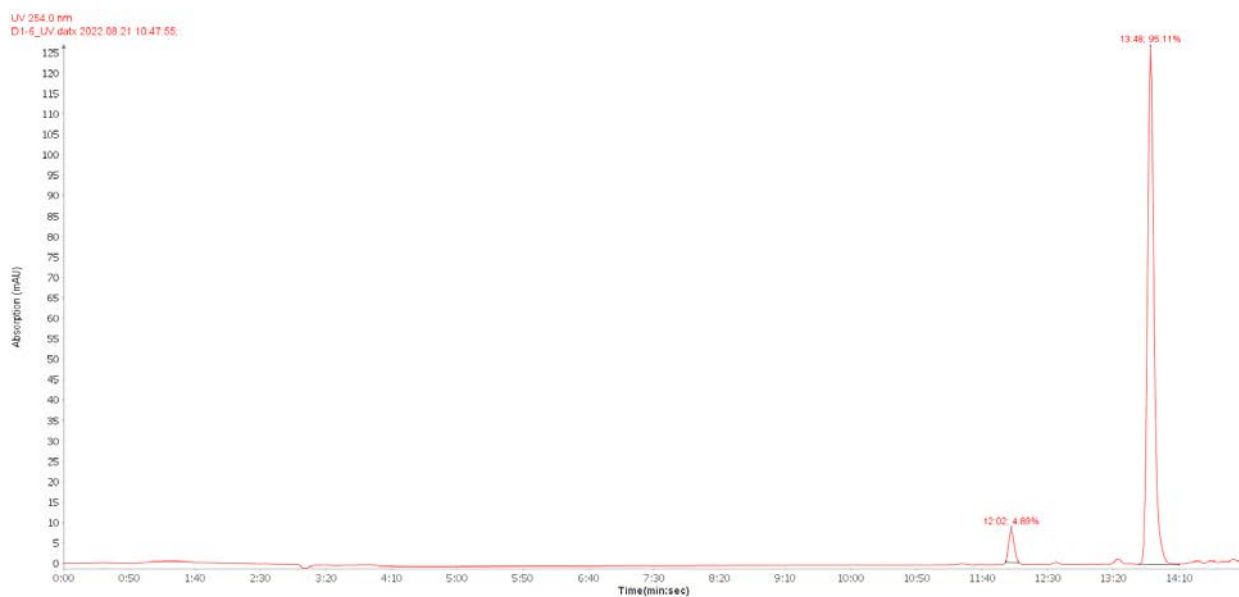

Figure S13: HPLC chromatogram of compound 5

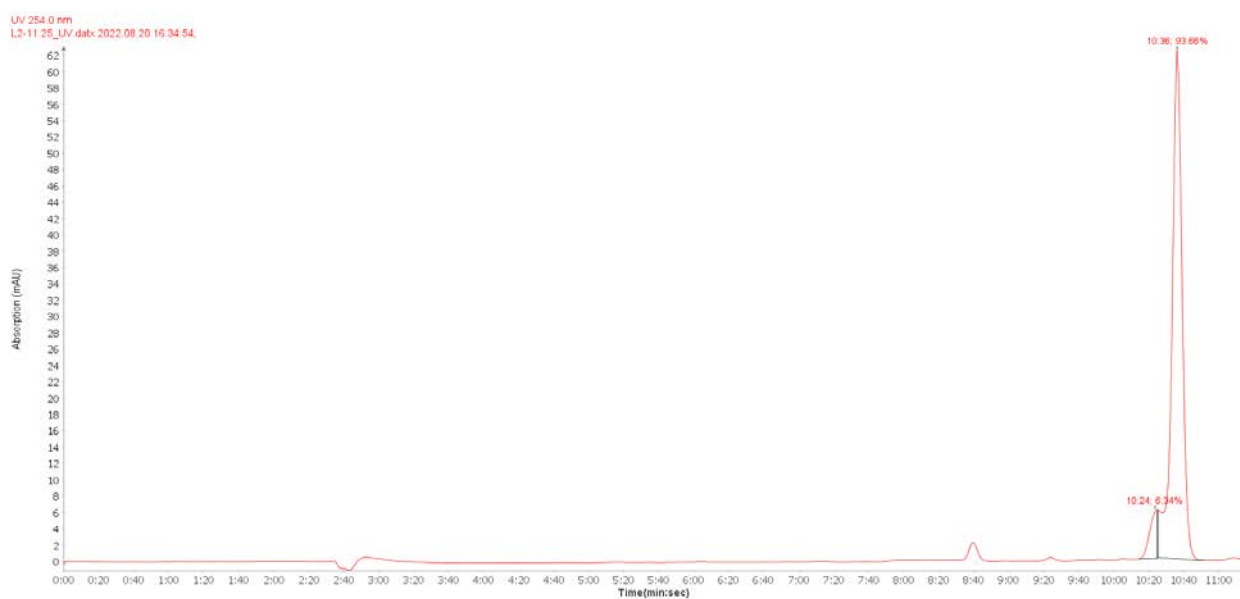

Figure S14: HPLC chromatogram of compound 11

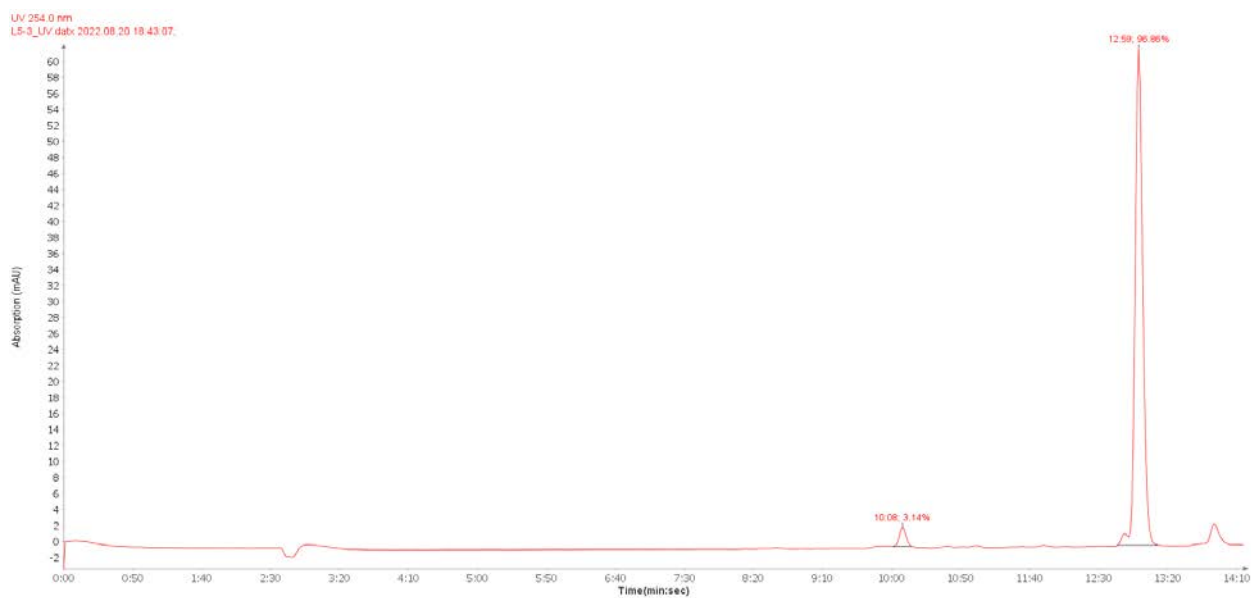

Figure S15: HPLC chromatogram of compound 15



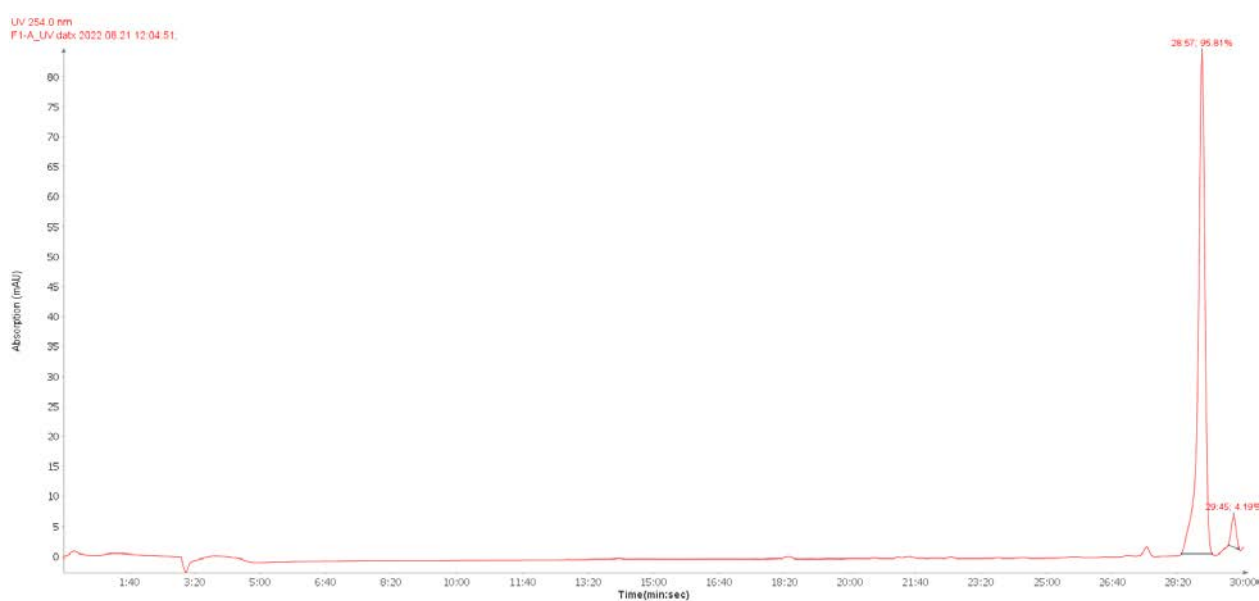

Figure S16: HPLC chromatogram of compound 7

L1-1\_220719194452 #1651 RT: 2.65 AV: 1 NL: 3.53E5  
T: ITMS + c ESI Full ms [200.00-550.00]

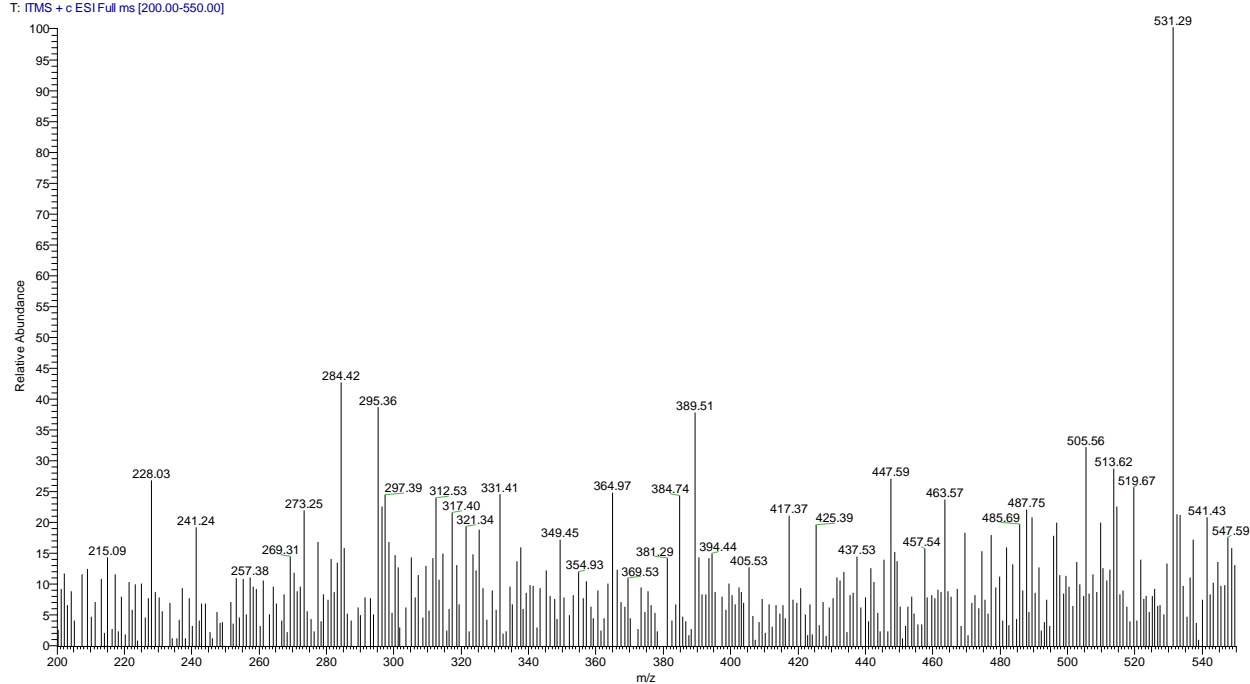

Figure S17: Mass spectrum of compound 4

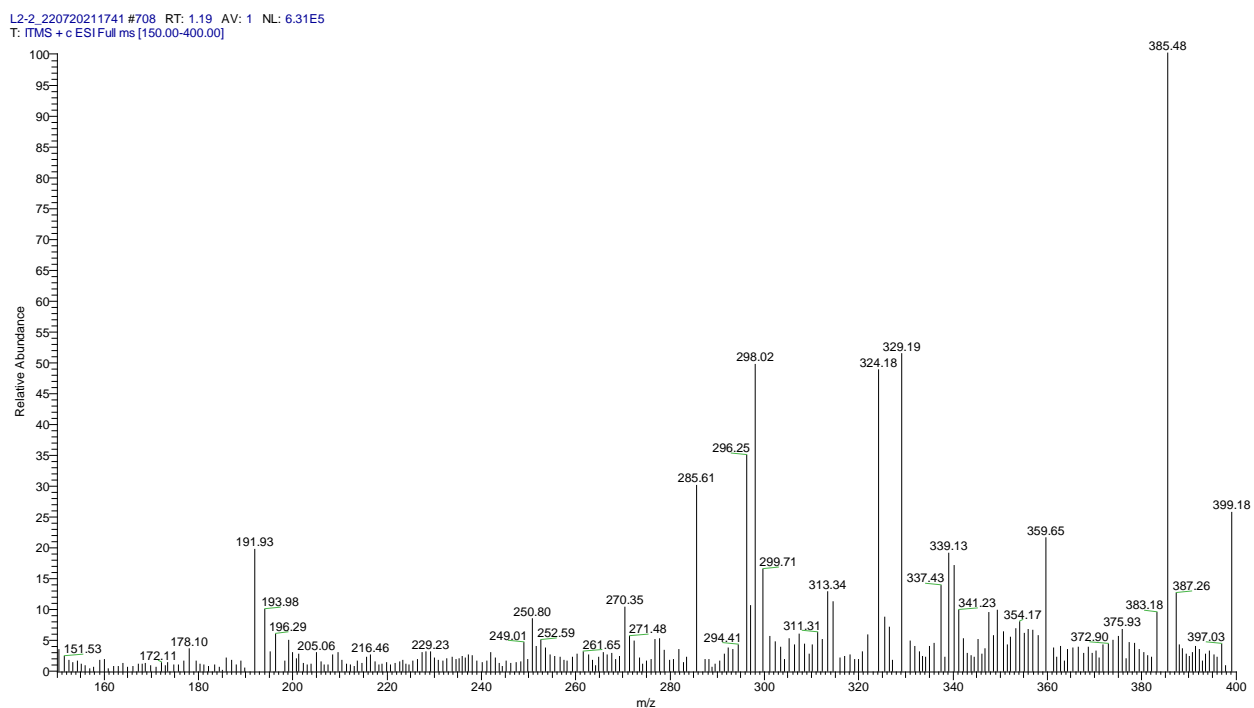

Figure S18: Mass spectrum of compound 11

L5-4\_220720192123 #1068 RT: 1.69 AV: 1 NL: 2.85E5  
T: ITMS + c ESI Full ms [150.00-475.00]

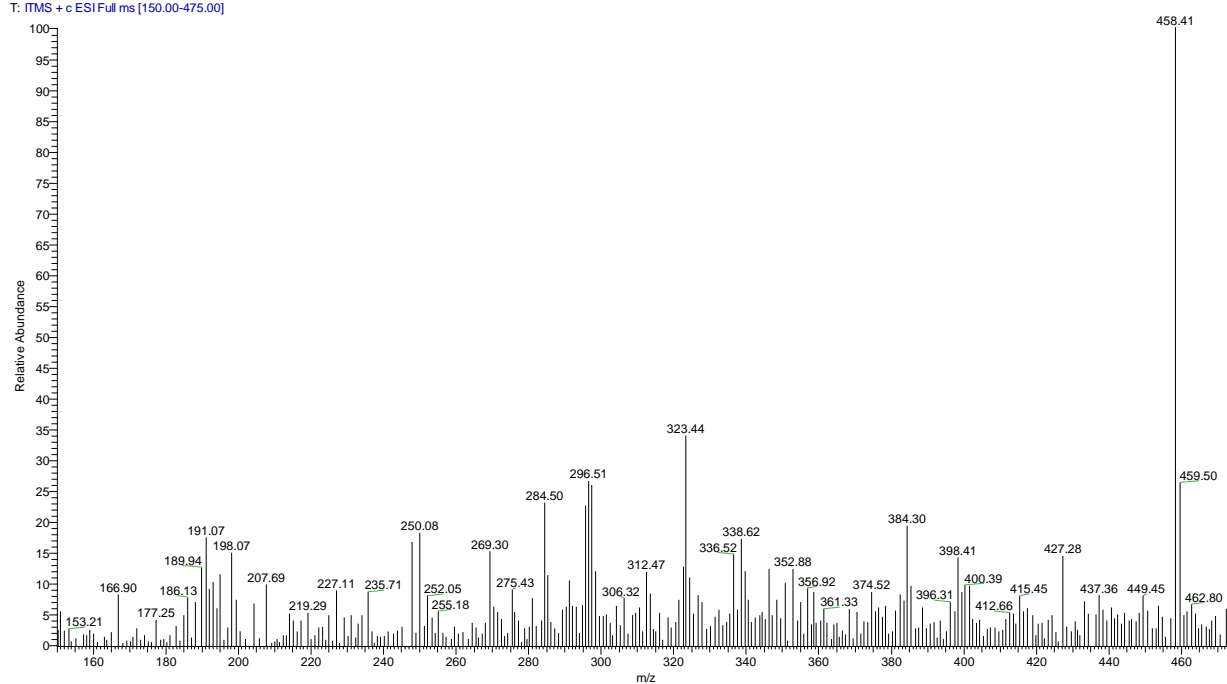

Figure S19: Mass spectrum of compound 15

D1-8\_220720211741 #2229 RT: 4.10 AV: 1 NL: 2.86E5  
T: ITMS + c ESI Full ms [150.00-635.00]

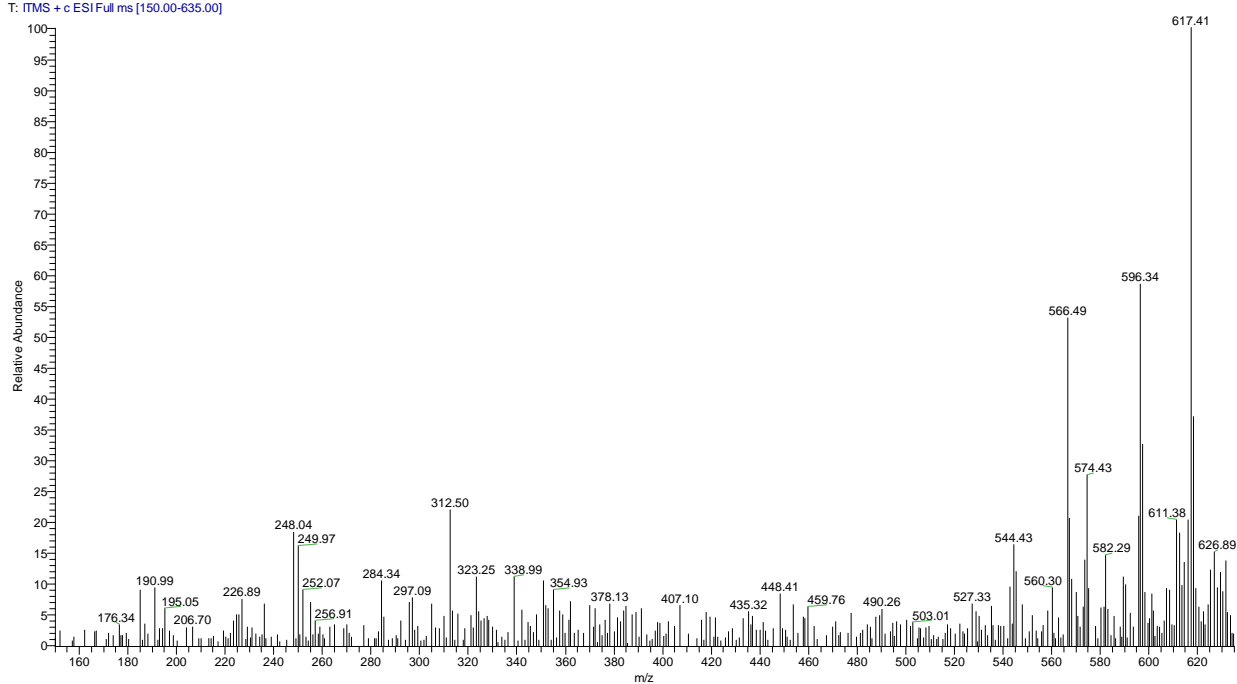

Figure S20: Mass spectrum of compound 5

F1-2\_220720211741 #86 RT: 0.15 AV: 1 NL: 8.71E5  
T: ITMS + c ESI Full ms [150.00-520.00]

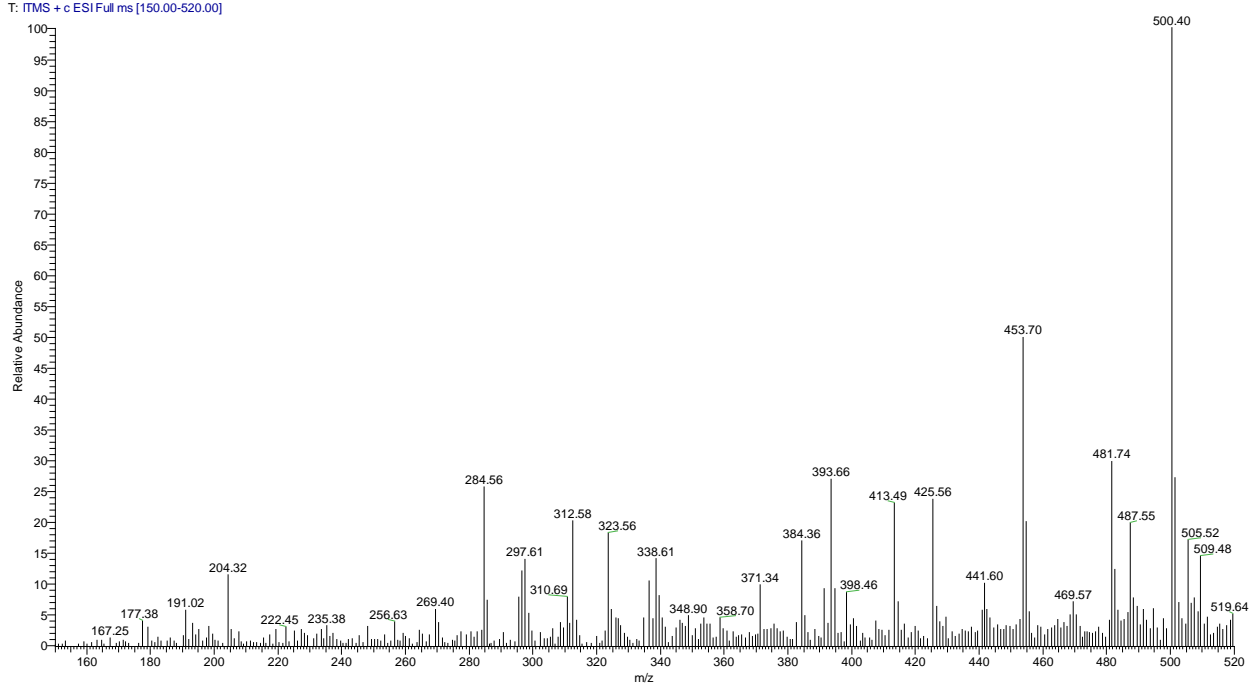

Figure S21: Mass spectrum of compound 7

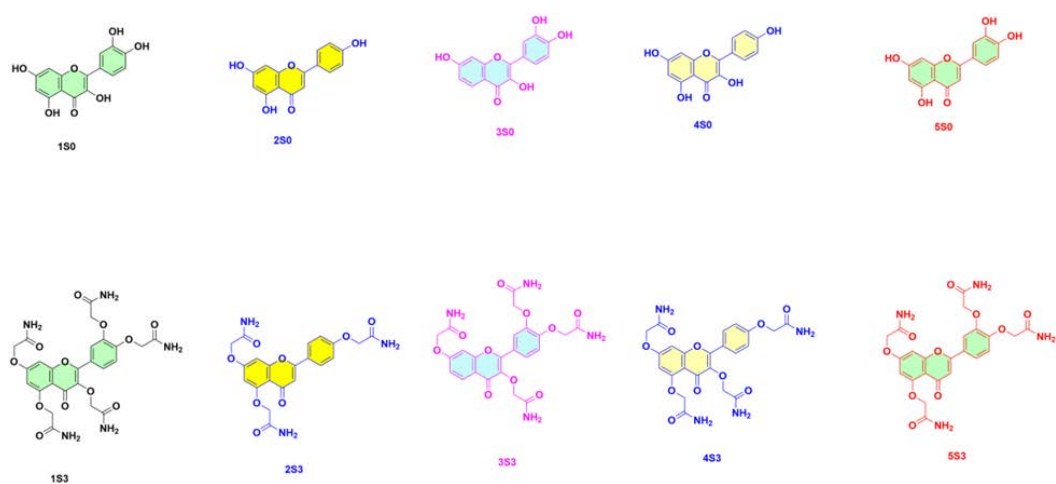

Figure S22: Structure of compounds 1S0-5S0 &amp; 1S3-5S3.
